# Supplementary material for: Engineering hierarchical interfaces in high-temperature polymer dielectrics for electrostatic supercapacitors
Source: Royal Society of Chemistry journal article supplement (doi:10.1039/d4mh01123f), 2024-01-01
Supplement: d4mh01123f1.pdf [file d4mh01123f1.pdf]

## **Engineering Hierarchical Interface in High-temperature Polymer Dielectrics for Electrostatic Supercapacitors**

Xu Fan<sup>a</sup>, Zhicheng Li<sup>a</sup>, Yu Zhang<sup>a</sup>, Peng Wang<sup>\*c</sup>, Jinjun Liu<sup>a</sup>, Jinhong Yu<sup>d</sup>, Jiwei Zhai<sup>c</sup>, Weiping Li<sup>\*b</sup>, and Zhongbin Pan<sup>\*a</sup>

*<sup>a</sup>School of Materials Science and Chemical Engineering, Ningbo University, Ningbo, Zhejiang, 315211, China. E-mail: panzhongbin@163.com (Z. Pan)*

*<sup>b</sup>School of Physical Sciences and Technology, Ningbo University, Ningbo, Zhejiang, 315211, China. E-mail: liweiping@nbu.edu.cn (W. Li)*

*<sup>c</sup>School of Materials Science and Engineering, Tongji University, Shanghai 201804, China. E-mail: dianlizi@126.com (P. Wang)*

*<sup>d</sup>Key Laboratory of Marine Materials and Related Technologies, Zhejiang Key Laboratory of Marine Materials and Protective Technologies, Ningbo Institute of Materials, Technology and Engineering, Chinese Academy of Sciences, University of Chinese Academy of Sciences, Ningbo, Zhejiang, China.*

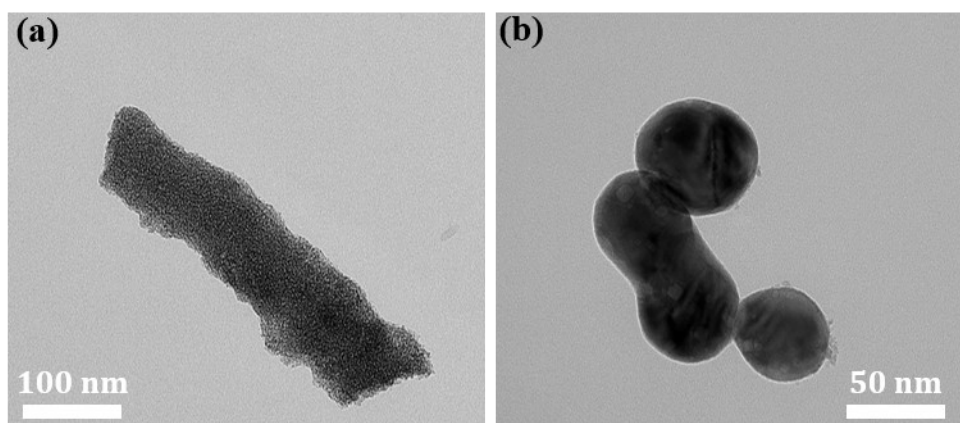

**Fig. S1** TEM images of (a)  $\text{Al}_2\text{O}_3$  nanofiber, (b)  $\text{BaTiO}_3$  nanoparticles

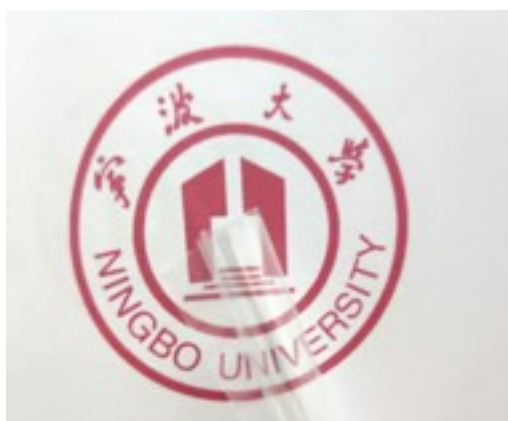

**Fig. S2** Digital photos of PESU-BT@AO NFs composite films.

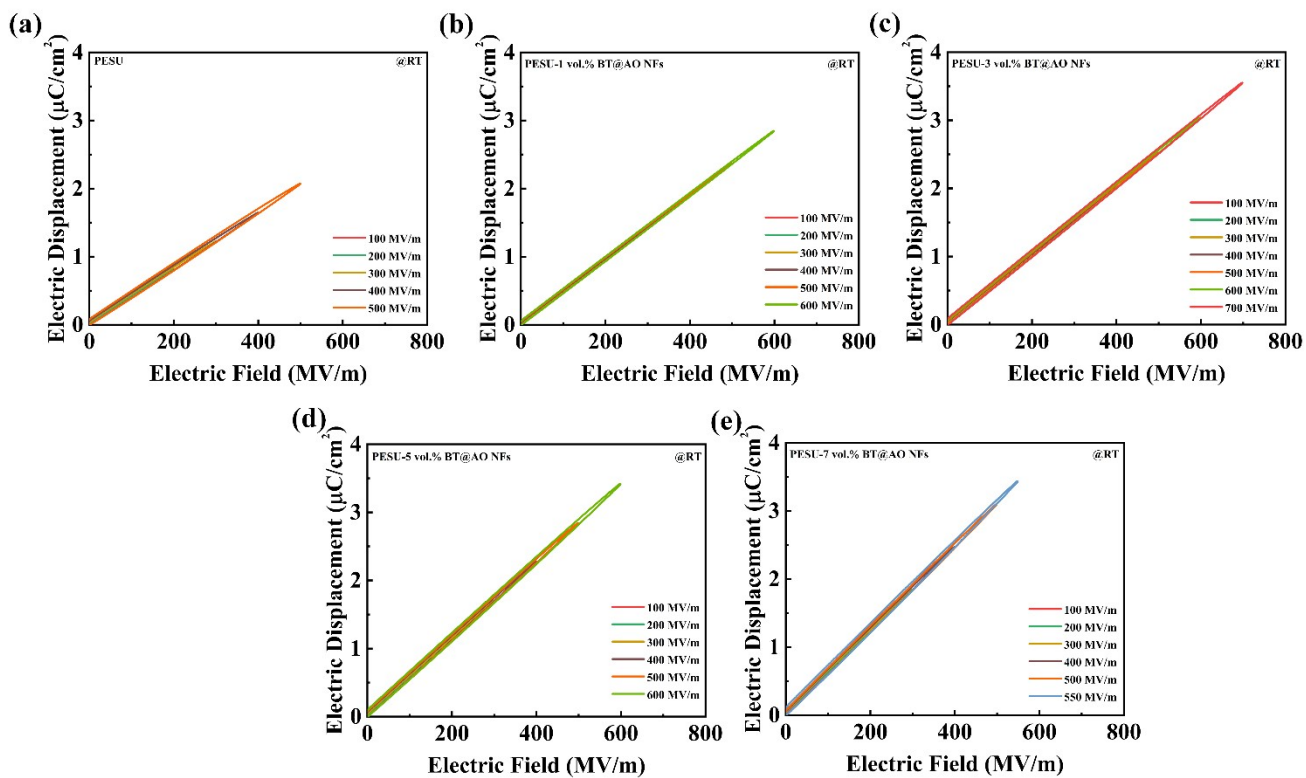

**Figure S3** *D-E* loops of PESU and PESU-BT@AO NFs composites at room temperature: (a) PESU, (b) 1 vol.%, (b) 3 vol.%, (c) 5 vol.% and (d) 7 vol.%

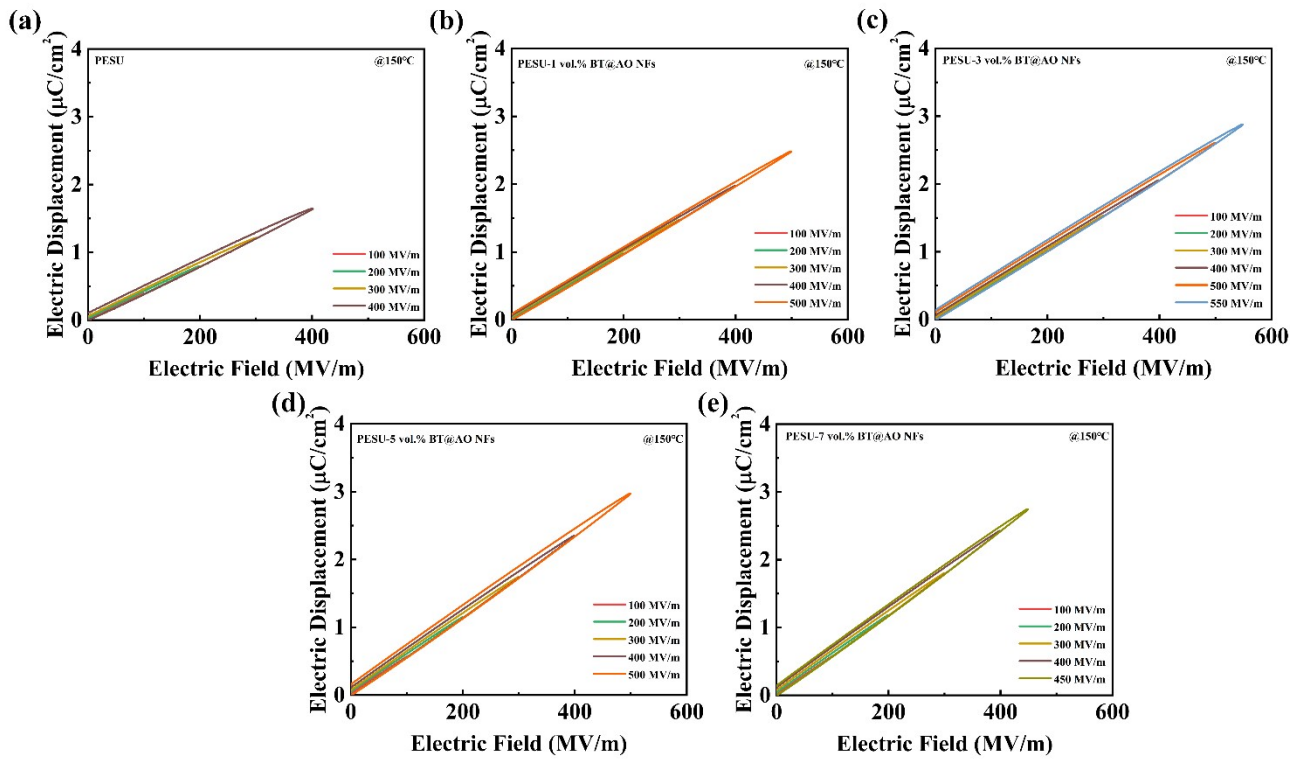

**Figure S4** *D-E* loops of PESU and PESU-BT@AO NFs composites at  $150^\circ\text{C}$ : (a) PESU, (b) 1 vol.%, (c) 3 vol.%, (d) 5 vol.% and (e) 7 vol.%
